# Supplementary material for: Politique de santé et de protection du citoyen: le deuxième programme d'action communautaire dans le domaine de la santé
Source: Royal Society of Chemistry journal article supplement (doi:10.1039/c5cp01560j), 2007-01-01
Supplement: c5cp01560j1.pdf [file c5cp01560j1.pdf]

## Supporting Information

# Self-Assembly of Photoswitchable Diblock Copolymers: Salt-induced Micellization and the Influence of UV Irradiation

Jing Zhang, Yue Zhang, Feiyang Chen, Weiyao Zhang and Hanying Zhao

### Experimental Section

**Materials.** 4,4'-Dinonyl-2,2'-bipyridine (dNbpy, 97%), 2-bromo-2-methylpropionyl bromide (98%), 2-bromoethanol (97%), 2,3,3-trimethyl-3H-indole (98%) and 2-hydroxy-5-nitrobenzaldehyde (98%) were purchased from Alfa Aesar, and were used as received. CuBr (Guo Yao Chemical Company, 99.5%) was purified by washing with glacial acetic acid and drying in a vacuum oven at 100 °C. THF (AR grade), DMF (AR grade), MeCN (AR grade), CHCl<sub>3</sub> (AR grade) and methanol (AR grade) were purchased from Tianjin Chemical Reagent Company in China. All the solvents were distilled before use.

**Characterization.** <sup>1</sup>H NMR spectra were recorded on a Varian UNITY-plus 400 M nuclear magnetic resonance spectrometer. The apparent molecular weights and molecular weight distributions were determined by gel permeation chromatography (GPC) equipped with a Hitachi L-2130 HPLC pump, a Hitachi L-2350 column oven operated at 40 °C, three Varian PL columns with 1000K–100K (100 000 Å), 100K–10K (10 000 Å), and 100–10K (1000 Å) molecular ranges, and a Hitachi L-2490 refractive index detector. THF was used as eluent at a flow rate of 1.0 mL/min. Molecular weights were calibrated on PS standards. UV-vis absorption spectra were performed on a Shimadzu UV-2450 spectrometer. Fluorescence spectra were collected on a Shimadzu RF-5301PC spectrofluorophotometer. Dynamic light scattering (DLS) measurements were measured on a Zetasizer Nano ZS from Malvern Instruments equipped with a 10 mW HeNe laser at a wavelength of 633 nm. The results were analyzed in CONTIN mode. Transmission electron microscopy (TEM) images were carried out on a Tecnai G2 20 S-TWIN electron microscope equipped with a Model 794 CCD camera. TEM specimens were prepared by dipping copper grids into the micellar solution (about 0.1 mg/mL) and drying in air. The specimens were stained by exposing to the vapor of ruthenium

tetroxide for 1.5 h at room temperature. Mass spectra were collected on a Finnigan Lcquadvantage spectrometer from Thermo Fisher Scientific.

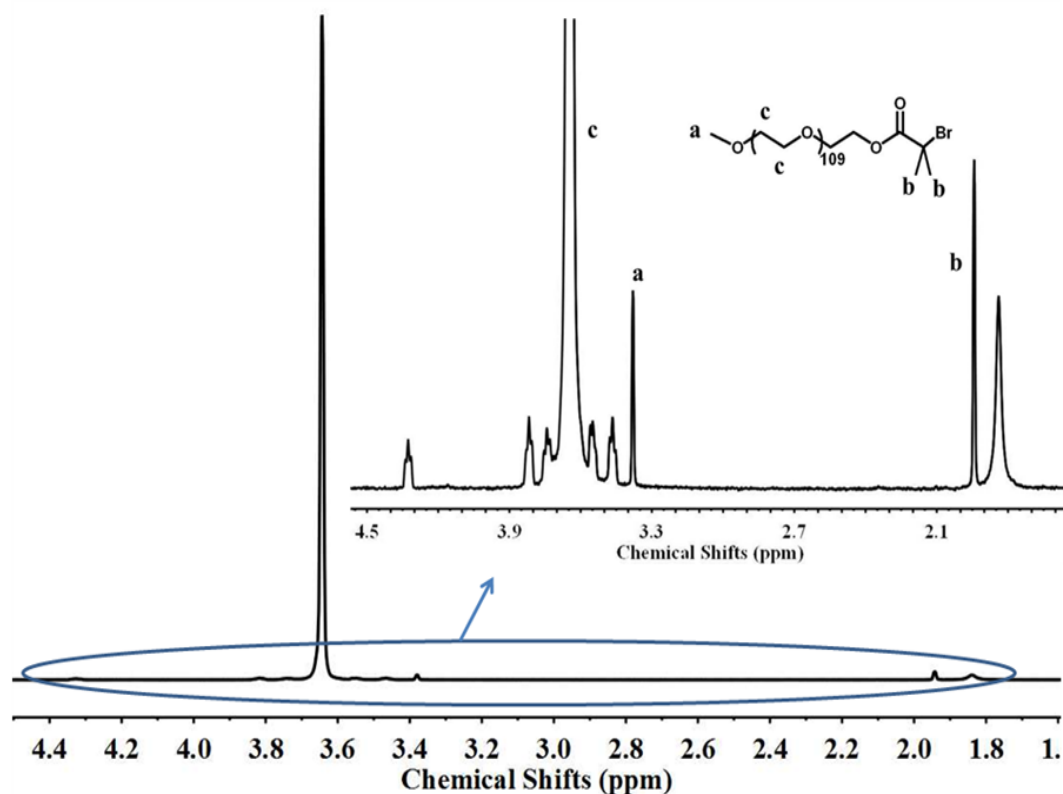

**Figure S1.**  $^1\text{H}$  NMR spectrum of macroinitiator PEG-Br. The spectrum was collected in  $\text{CDCl}_3$ .

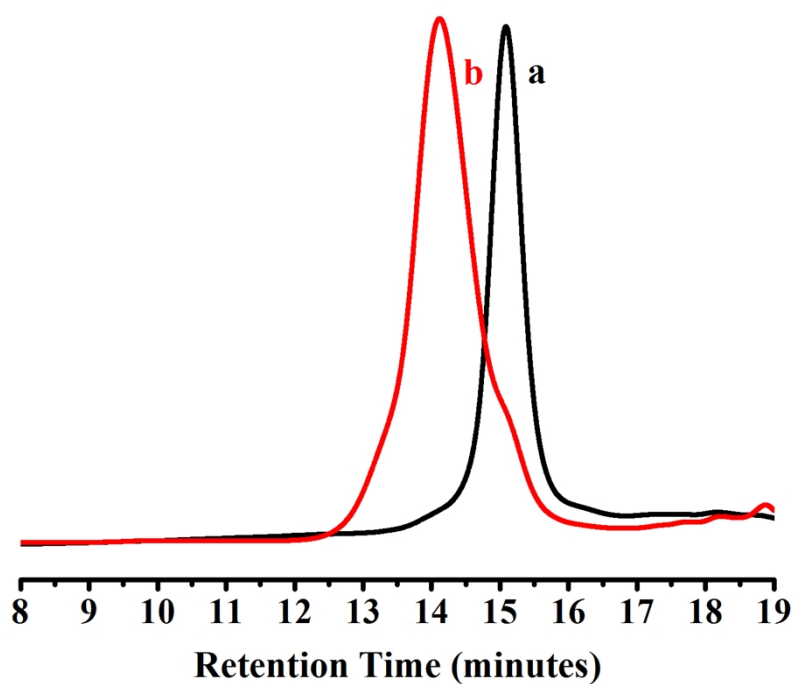

**Figure S2.** GPC traces of (a) macroinitiator PEG-Br and (b) PEG-*b*-PSPMA<sub>20</sub> block copolymer.

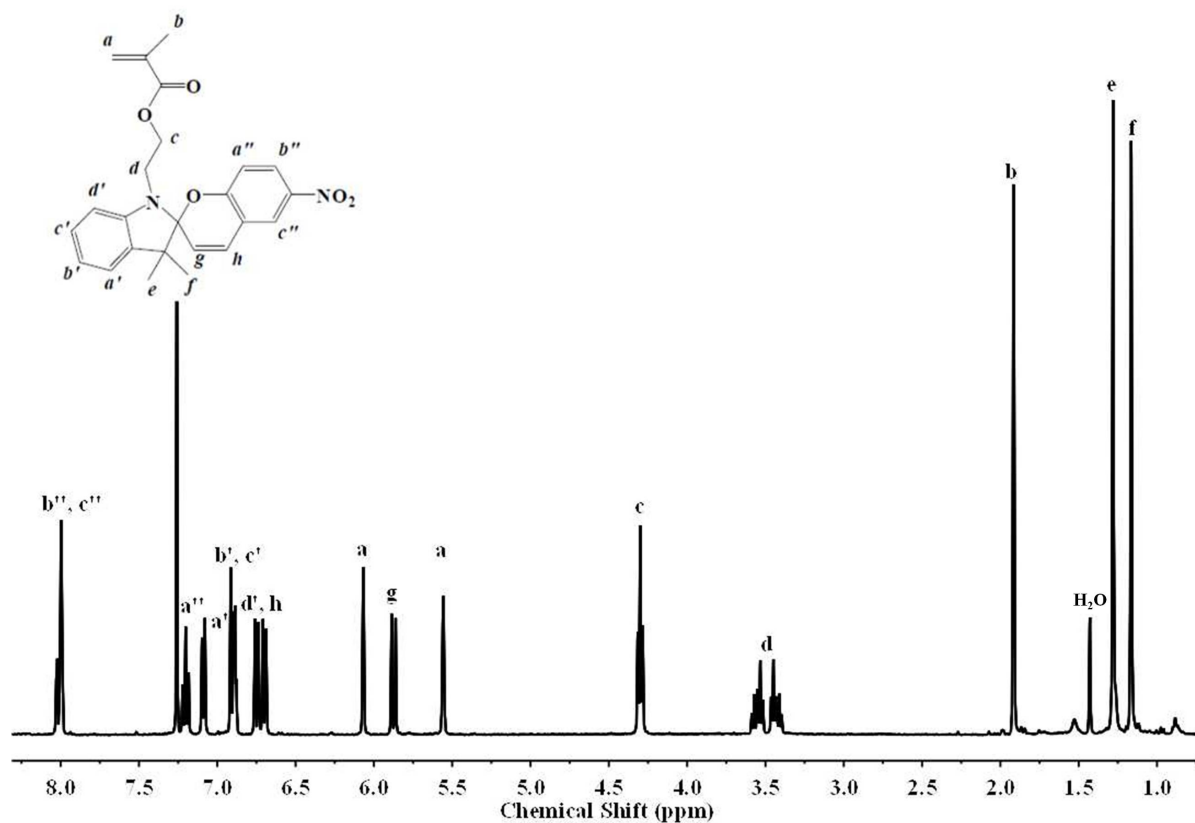

**Figure S3.**  $^1\text{H}$  NMR spectrum of SPMA monomer. The spectrum was collected in  $\text{CDCl}_3$ .

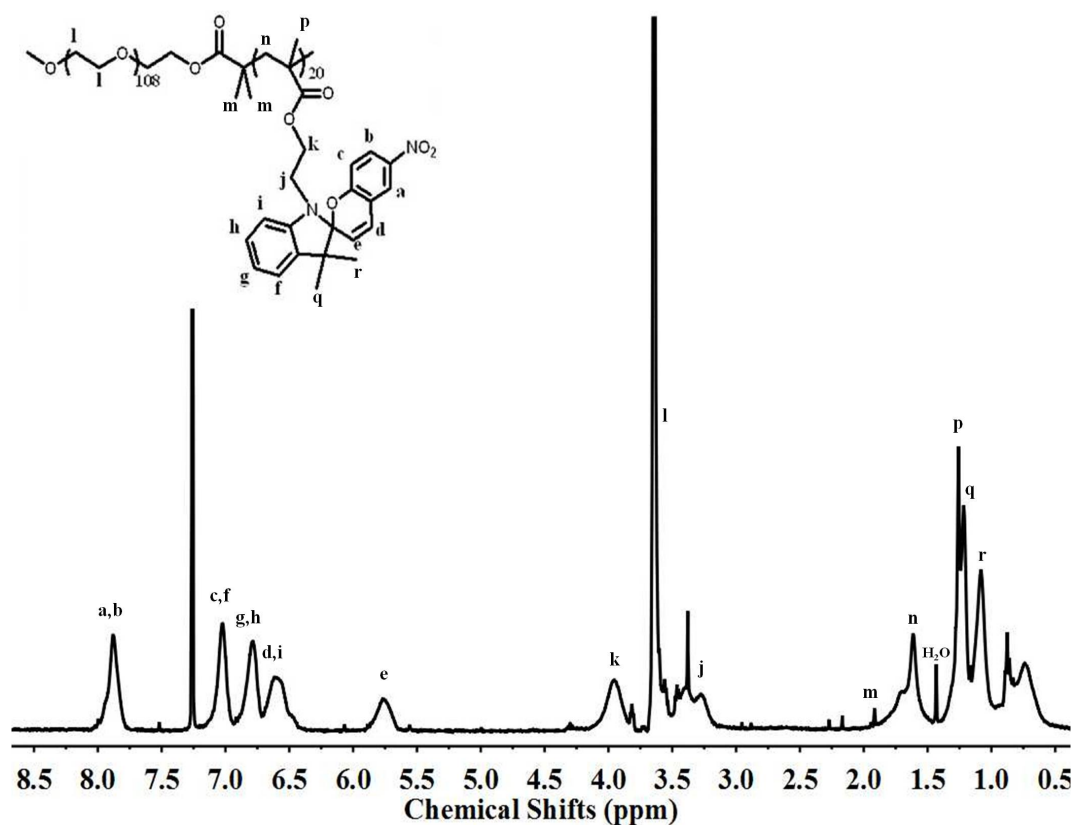

**Figure S4.**  $^1\text{H}$  NMR spectrum of PEG-b-PSPMA<sub>20</sub> block copolymer. The spectrum was collected in  $\text{CDCl}_3$ .

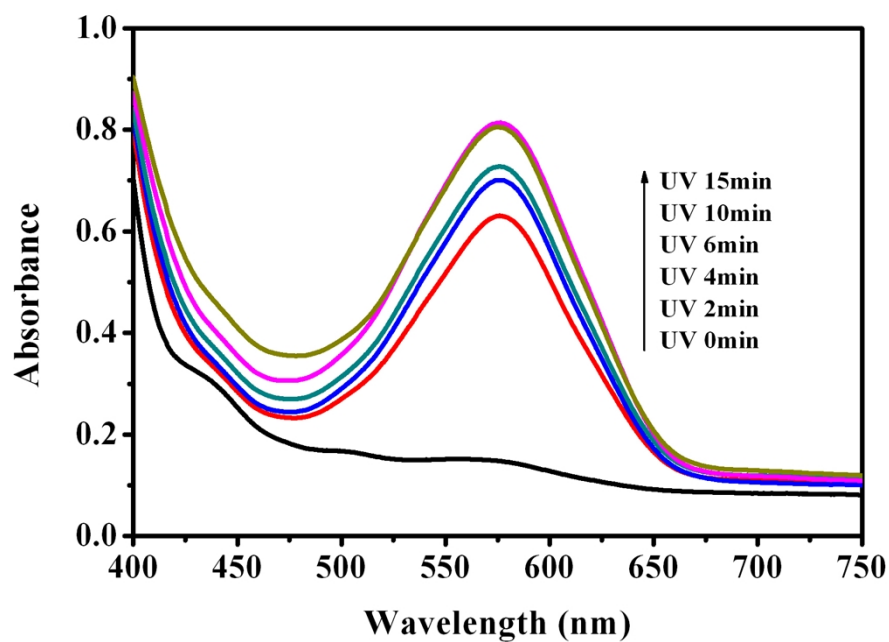

**Figure S5.** Absorption spectra of PEG-b-PSPMA<sub>31</sub> in DMF upon UV irradiation (365 nm) for different exposure time intervals.

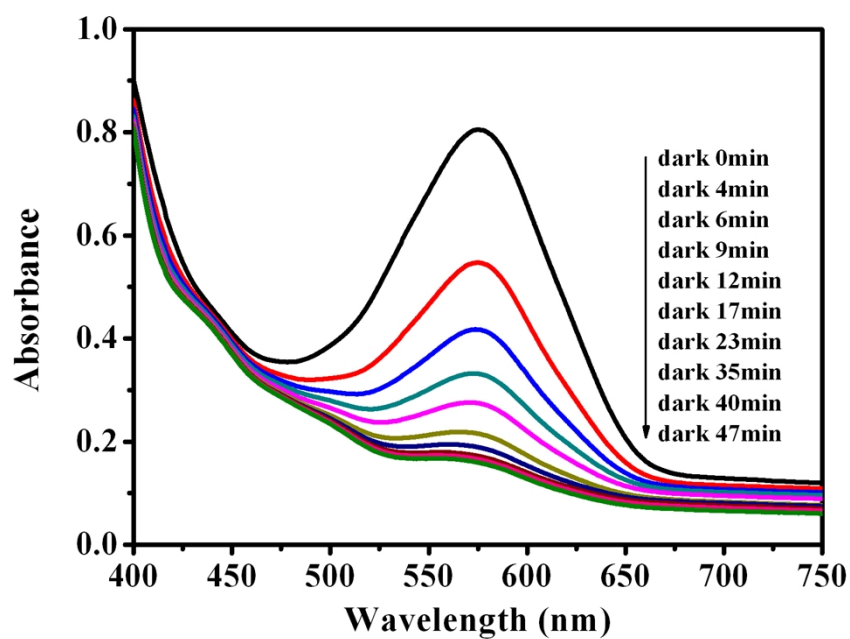

**Figure S6.** Back-photoisomerization process of PEG-b-PSPMA<sub>31</sub> in DMF solution in the dark recorded at various times.

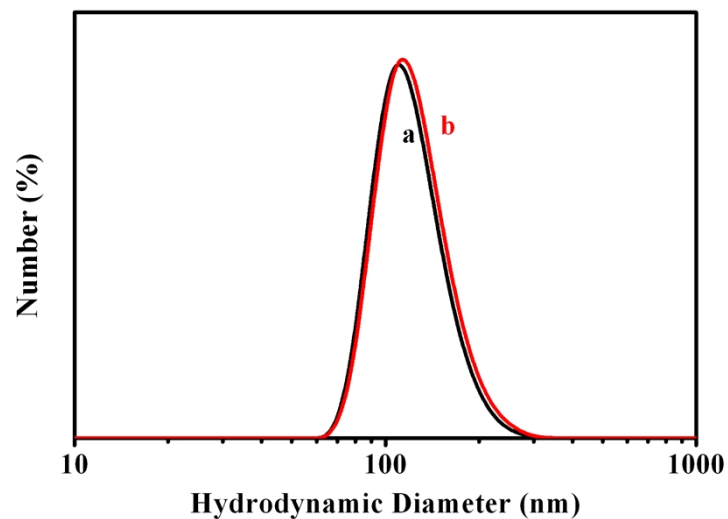

**Figure S7.** (a) DLS curves of PEG-b-PSPMA<sub>20</sub> micelles induced by FeCl<sub>3</sub> in 10:1 DMF/H<sub>2</sub>O mixture after 30 min UV irradiation. The molar ratio of SP to Fe<sup>3+</sup> is 3:1. (b) DLS curves of the micelles standing by in the dark overnight.

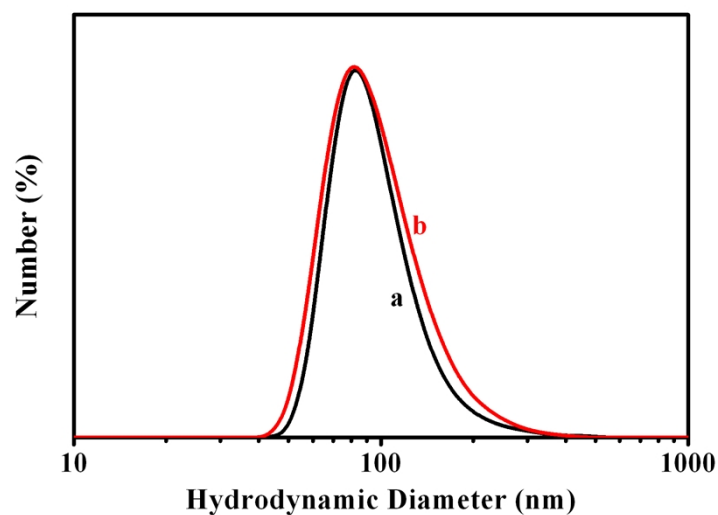

**Figure S8.** (a) DLS curves of PEG-b-PSPMA<sub>20</sub> micelles induced by Zn(Ac)<sub>2</sub> in 10:1 DMF/H<sub>2</sub>O mixture after 30 min UV irradiation. The molar ratio of SP to Zn<sup>2+</sup> is 2:1. (b) DLS curves of the micelles standing by in the dark overnight.

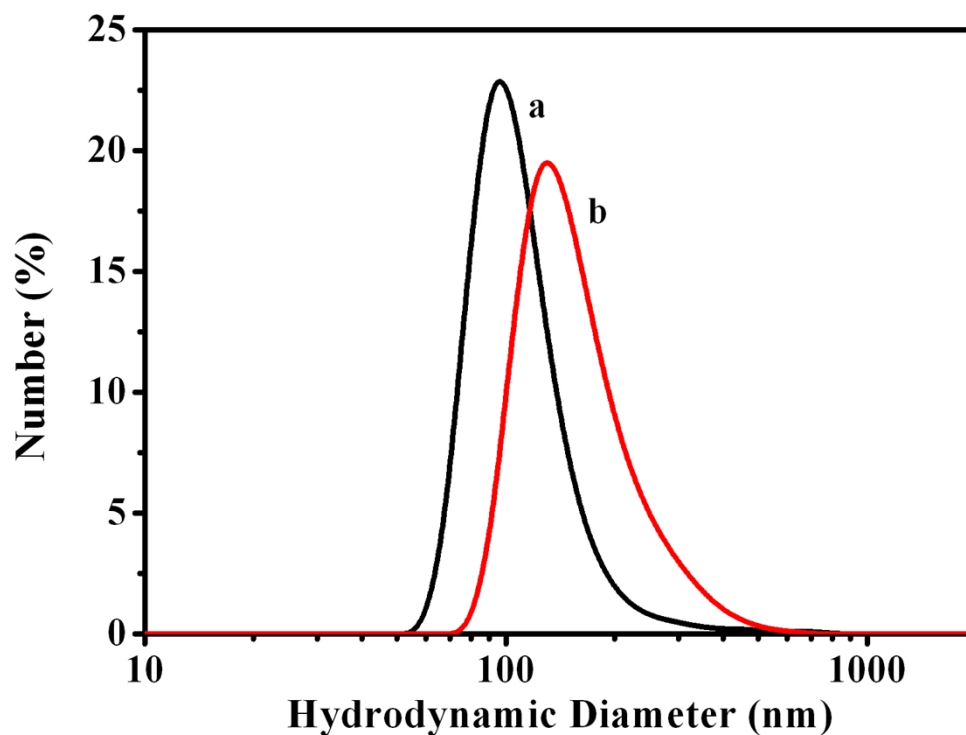

**Figure S9.** DLS curves of CuCl<sub>2</sub>-induced PEG-b-PSPMA<sub>31</sub> micelles in 10:1 DMF/H<sub>2</sub>O mixture after 30 and 60 min UV irradiation. The diblock polymer concentration in the solution is 0.01 wt%.

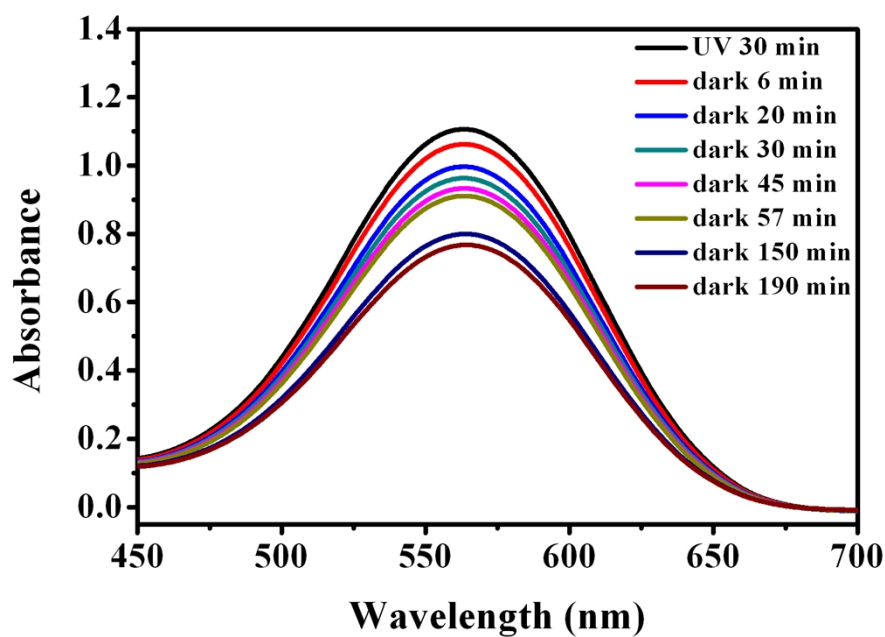

**Figure S10.** Back-photoisomerization process of micelles formed by PEG-b-PSPMA<sub>20</sub> in aqueous solution in the dark.
